# Supplementary material for: An organoid-based CRISPR-Cas9 screen for regulators of intestinal epithelial maturation and cell fate
Source: PubMed Central journal article supplement (PMC10337909; doi:10.1126/sciadv.adg4055), 2023-07-12
Supplement: sciadv.adg4055_sm.pdf [file sciadv.adg4055_sm.pdf]

Supplementary Materials for  
**An organoid-based CRISPR-Cas9 screen for regulators of intestinal epithelial  
maturation and cell fate**

Stine L. Hansen *et al.*

Corresponding author: Kim B. Jensen, kim.jensen@sund.ku.dk

*Sci. Adv.* **9**, eadg4055 (2023)  
DOI: 10.1126/sciadv.adg4055

**This PDF file includes:**

Figs. S1 to S6  
Table S1

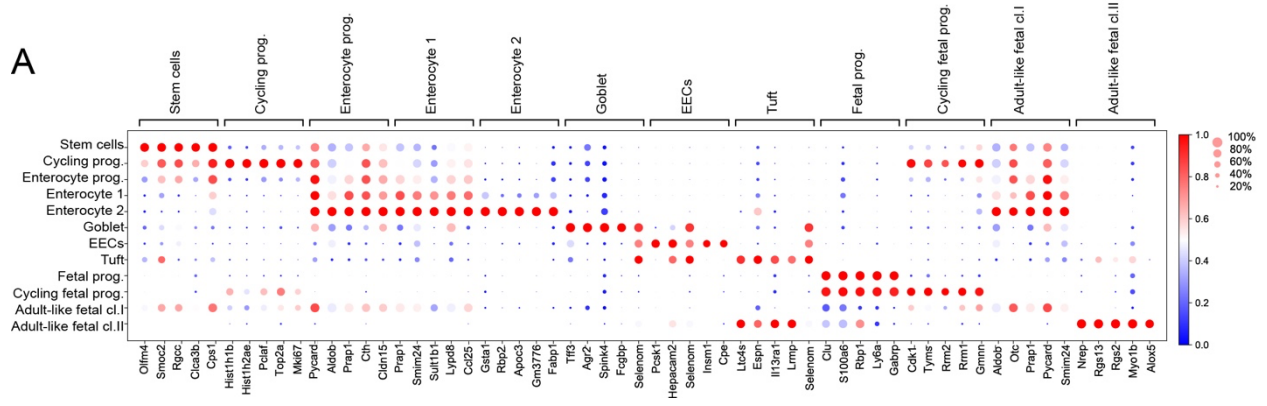

**Figure S1:**

(A) Heatmap of gene expression across cell clusters shown in Fig.1B.



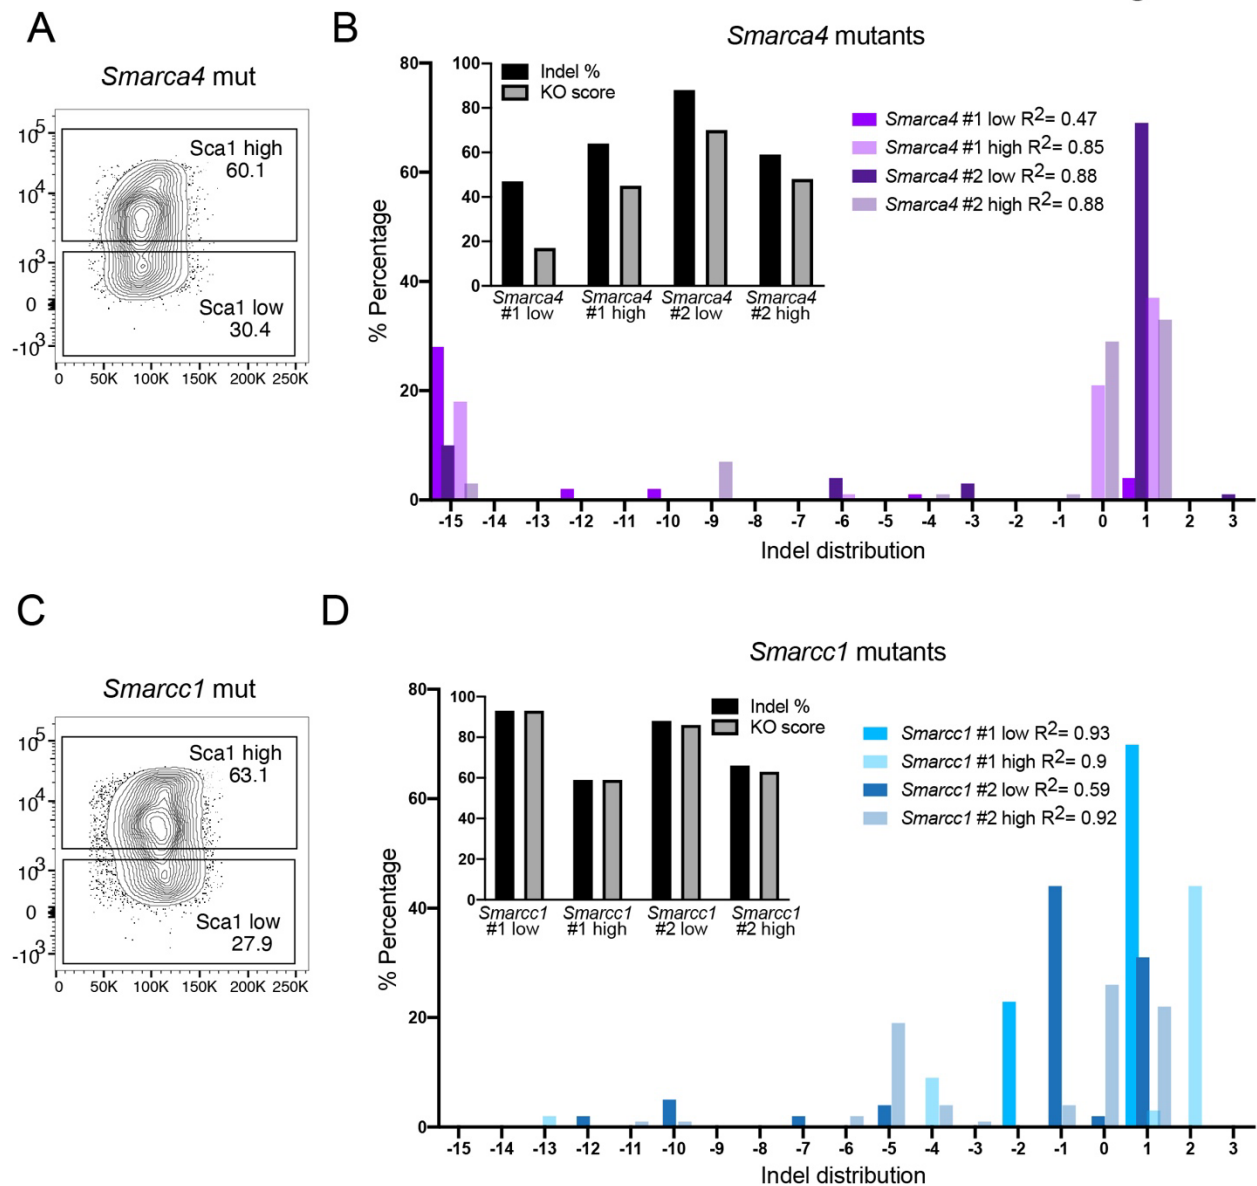**Figure S3:**

(A) Representative FACS plot of Sca1 expression in one out of two *Smarca4* mutant organoid lines one passage after lentiviral sgRNA transduction. Sca1<sup>High</sup> and Sca1<sup>Low</sup> cells were sorted and cultured separately. (B) Indel analysis based on Sanger sequencing of duplicates of *Smarca4* mutant organoids, Sca1<sup>High</sup> and Sca1<sup>Low</sup> sorted, generated with Synthego's ICE tool. Indel distribution from -15 to +3 base pair position around expected cut site from specified cell populations is shown.  $R^2$  indicates how well the predicted indel distribution and KO score align with the provided sequence for analysis. Inserted plots show indel percentage and KO score of

indicated cells. **(C)** Representative FACS plot of Sca1 expression in one out of two *Smarcc1* mutant organoids one passage after lentiviral sgRNA transduction. Sca1<sup>High</sup> and Sca1<sup>Low</sup> cells were sorted and cultured separately. **(D)** Indel analysis based on Sanger sequencing of duplicates of *Smarcc1* mutant organoids, Sca1<sup>High</sup> and Sca1<sup>Low</sup> sorted, generated with Synthego's ICE tool. Indel distribution from -15 to +3 base pair position around expected cut site from specified cell populations is shown.  $R^2$  indicates how well the predicted indel distribution and KO score align with the provided sequence for analysis. Inserted plots show indel percentage and KO score of indicated cells

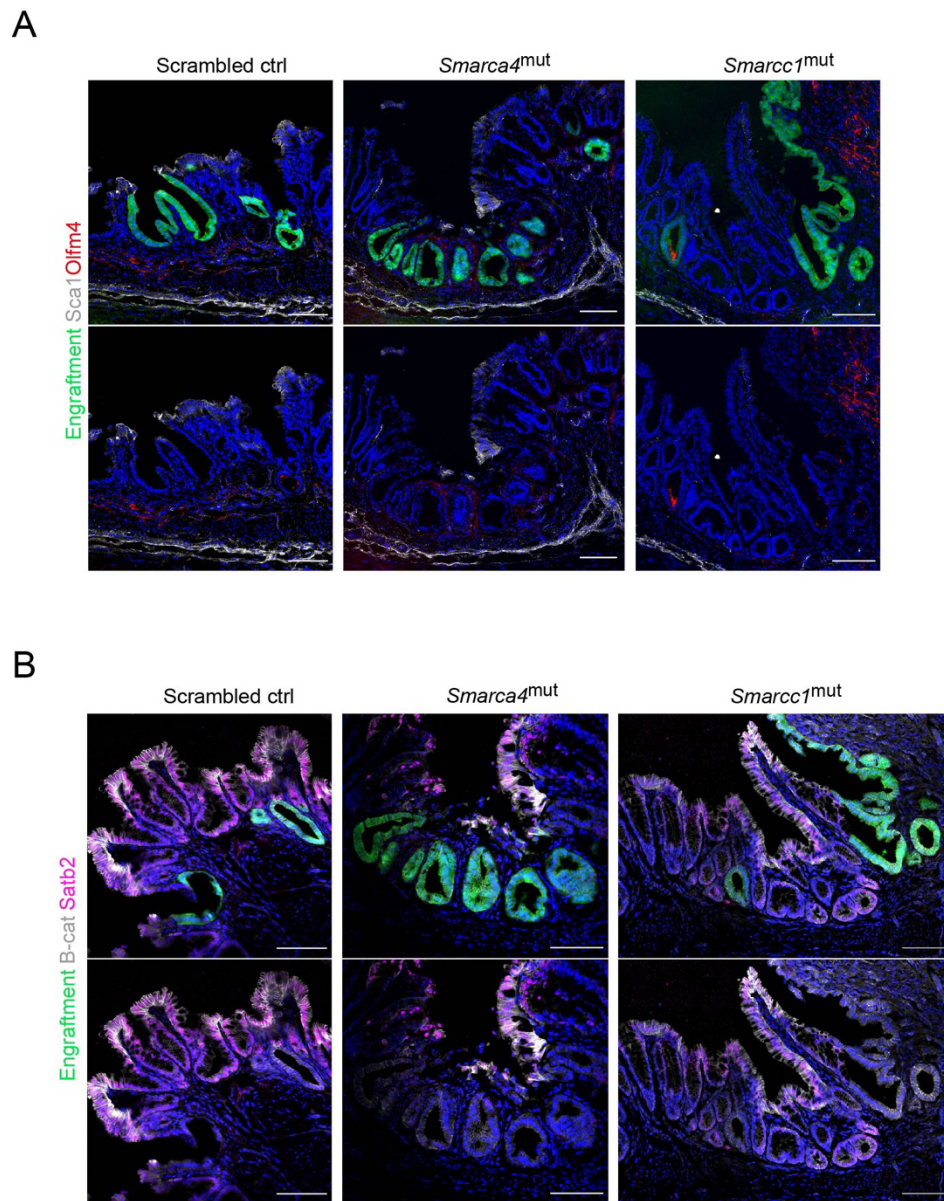**Figure S4:**

(A) Immunofluorescence staining of Olfm4 (red) and DAPI (blue) in engrafted GFP<sup>+</sup> (green) tissue of scrambled control, *Smarca4*<sup>mut</sup> and *Smarcc1*<sup>mut</sup>. Scale bar 100  $\mu$ m. (B) Immunofluorescence staining of Satb2 (pink),  $\beta$ -catenin (white) and DAPI (blue) in engrafted GFP<sup>+</sup> (green) tissue of scrambled control, *Smarca4*<sup>mut</sup> and *Smarcc1*<sup>mut</sup>. Scale bar 100  $\mu$ m.

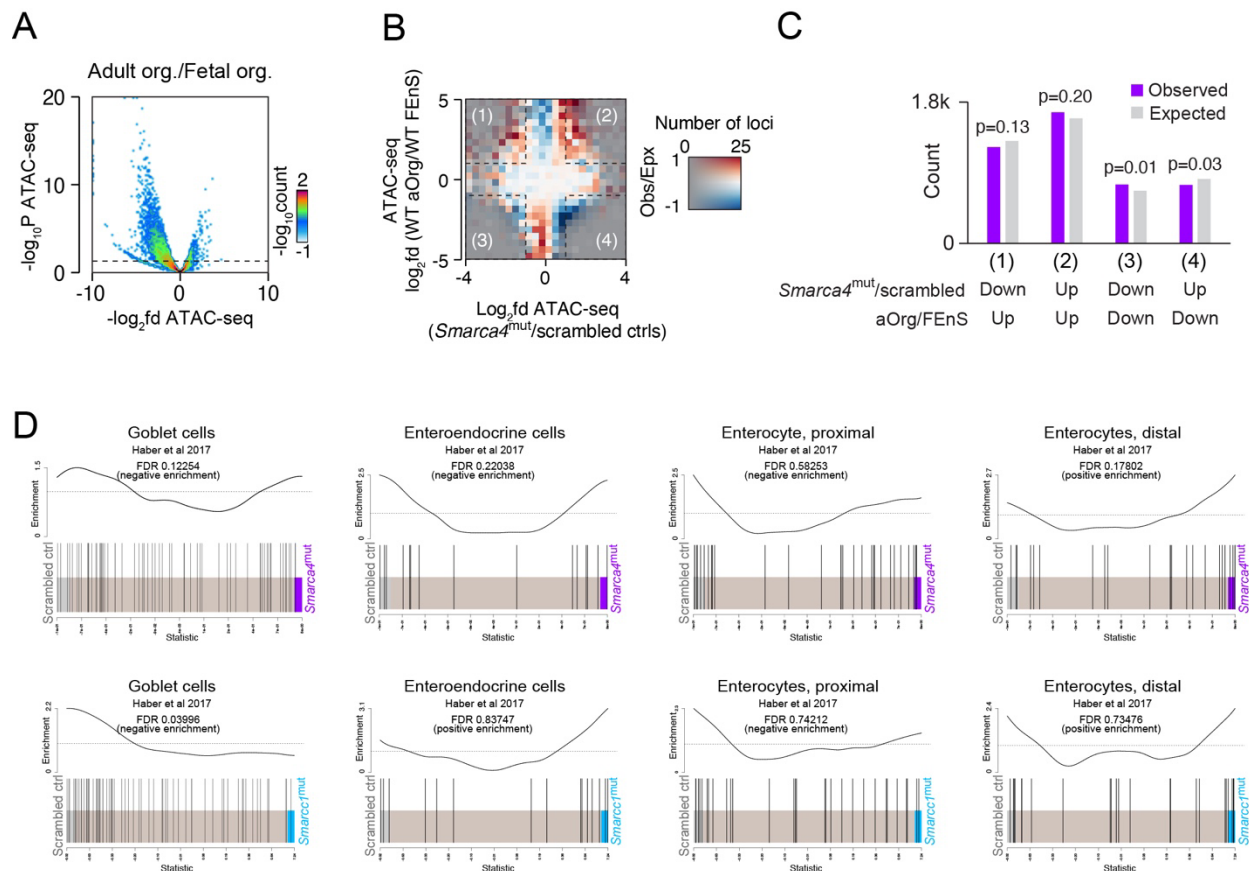**Figure S5:**

(A) Volcano plot of differential ATAC-seq regions of adult organoids vs FEnS at FEnS-specific enhancer regions ( $n=7,492$ ). P-values were Benjamini-Hochberg corrected for multiple testing, and the dashed line indicates the 0.05 significance threshold. (B) Matrix of the  $\log_2$  fold difference in observed vs expected occurrences of loci in *Smarca4*<sup>mut</sup> organoids vs scrambled control FEnS (x-axis) compared to ATAC-seq regions in WT control FEnS and adult organoids (y-axis) at enhancer regions ( $n=57,353$ ). Opacity is adjusted according to the number of loci with a given combination of changes. Red colour indicates more changes than expected, and blue colour indicates less changes than expected. (C) Bar plot of observed counts (purple) and expected counts (grey) of changed loci in the four squares of the matrix plot shown in (B). P-values from Bonferroni-corrected chi-square tests are indicated. (D) GSEA of differentiated cell types (Goblet cells, enteroendocrine cells, enterocytes from proximal and distal small intestine) enriched in the transcriptome of scrambled control line and *Smarca4*<sup>mut</sup> (top) or *Smarcc1*<sup>mut</sup> (bottom). FDR value for positive or negative enrichment in the mutant lines are indicated.

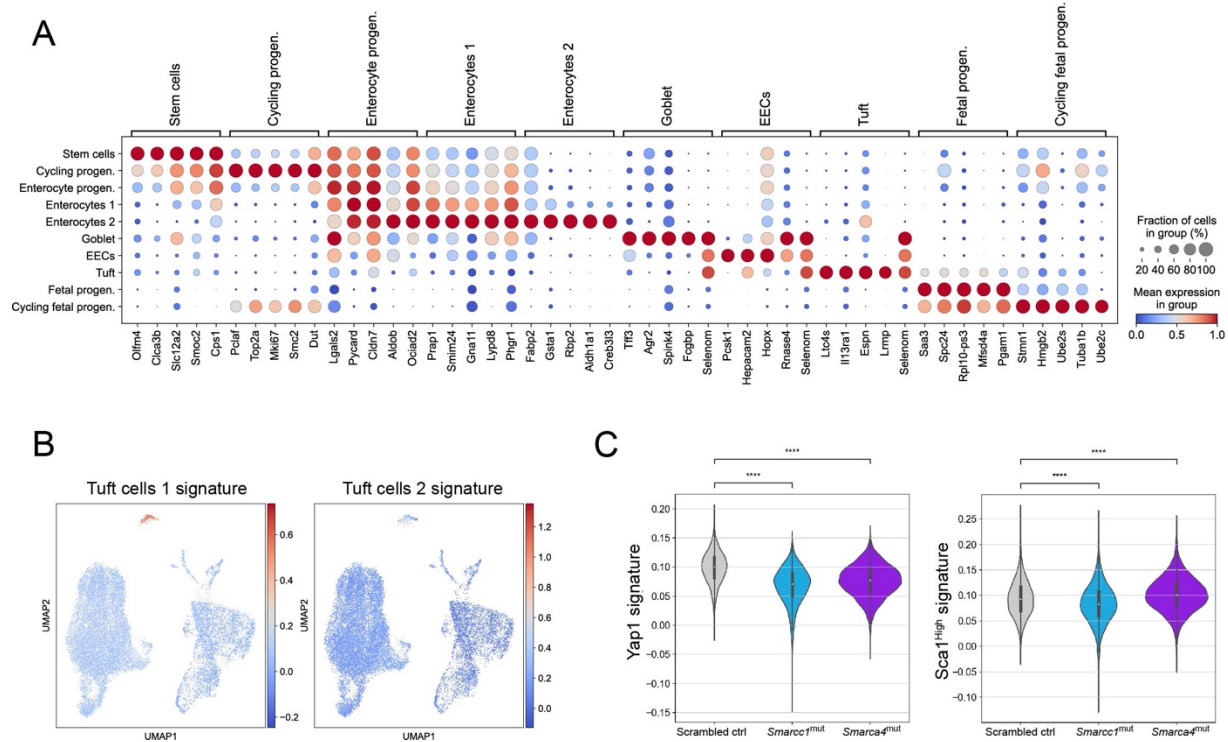**Figure S6:**

(A) Heatmap of gene expression across cell clusters shown in Fig. 6B. (B) UMAP showing tuft cell 1 (left plot) and tuft cell 2 (right plot) gene signatures. (C) Violin plot showing expression of Yap1-driven gene signature (left plot) and  $Sca1^{\text{High}}$  gene signature (right plot) from Yui et al. 2018 in cells from scrambled control,  $Smarcc1^{\text{mut}}$  and  $Smarca4^{\text{mut}}$  organoids. \*\*\*\*= $p < 0.0001$ , Mann-Whitney U test Bonferroni correction.



Table S1

|                   | Name                | Sequence                                                                                  |                     |
|-------------------|---------------------|-------------------------------------------------------------------------------------------|---------------------|
| Oligo PCR         | sgRNA-oligo_PCR_Fw  | GGCTTTATATATCTTGTGGAAAGGACGAAACACCG                                                       |                     |
|                   | sgRNA-oligo_PCR_Rev | CTAGCCTTATTTAACTTGCTATTTCTAGCTCTAAAAC                                                     |                     |
| sgRNA library seq | sgRNA-seq_PCR1_Fw   | TCTTGTGGAAAGGACGAAACACCG                                                                  |                     |
|                   | sgRNA-seq_PCR1_Rev  | TCTACTATTCTTCCCTGCACTGT                                                                   |                     |
|                   | sgRNA-seq_PCR2_Fw   | AATGATACGGCGACCACCGAGATCTACACTCTTCCCTACACGAC<br>GCTCTCCGATCTTTAGGCTCTTGTGGAAAGGACGAAACACC |                     |
|                   | sgRNA-seq_PCR2_Rev  | CAAGCAGAAGACGGCATAACGAGATN*GTGACTGGAGTTCAGAC<br>GTGTGCTCTCCGATCTATTCTTCCCTGCACTGTACC      | N* 6 basepair index |
| sgRNA             | Smarca4 sgRNA       | TGGTTCTCGCCACCGCAAGG                                                                      |                     |
|                   | Smarcc1 sgRNA       | GCTTGCCGGCGAAACCTGAC                                                                      |                     |
| Indel analysis    | Smarca4_seq_fw1     | GCTGGGTCAGTCCCCAAAAT                                                                      |                     |
|                   | Smarca4_seq_rev2    | CCTCCAGGGGAATTTGCTGAT                                                                     |                     |
|                   | Smarcc1_seq_fw1     | TGCTTAGCAACCAAGACCACA                                                                     |                     |
|                   | Smarcc1_seq_rev1    | ATTCCTTCCCCCAGGAGTCA                                                                      |                     |

**Table S1: Oligo list**

Sequence of oligos used.
